# Supplementary material for: Qualitative Mixed Methods Analysis of Post-Radiation Prostate Cancer Survivorship
Source: Research Square preprint supplement (doi:10.21203/rs.3.rs-8198626/v1), 2025-12-01
Supplement: Supplementary file 1 [file 0af588c7421f5bd4baed75ab.docx]

**Supplementary table 1.** Frequency ofmentions of pelvic adverse effects by category with examples of patients quotes.

| **Adverse Effect** | **Patient Quote** | **User Category (Number of Mentions)** |
| --- | --- | --- |
| Difficulty urinating | *“Things really took a turn for the worse following the last radiation treatment. Urinating became a bitter struggle…spent the next 9 weeks with a catheter for obvious reasons.”* | Brachytherapy (9)  CyberKnife (2)  External Beam Radiation (2)  General Radiation (2)  Intensity Modulated Radiation (3)  Grade 1-2 Adverse Effects (4)  Grade 3-4 Adverse Effects (5)  **All (27)** |
| *“My husband still has difficulty urinating after 6 months (radiation seed implants) and cannot seem to get any relief”* |
| *“My experience to date (8 months out) are…so far manageable, with…urination difficulty with a full bladder.”* |
| Painful urination | *“Now, just about 5 months later, my prostate is still severely inflamed…also have incontinence, which is also extremely painful every time a drop comes out.”* | Brachytherapy (10)  CyberKnife (5)  External Beam Radiation (1)  Intensity Modulated Radiation (1)  Grade 1-2 Adverse Effects (6)  **All (25)** |
| *“I also have had burning during urination since the treatment in 2006, and sex feels like fire”* |
| *“Last month started having burning while urinating. Doc says maybe late RT side effect.”* |
| Increased Urine Frequency | *“The cancer is gone, but this frequency/urgency/nocturia started up about 2 years ago and…continues”* | Brachytherapy (13)  CyberKnife (4)  External Beam Radiation (1)  Intensity Modulated Radiation (3)  Grade 1-2 Adverse Effects (6)  Grade 3-4 Adverse Effects (4)  **All (31)** |
| *“After two years I started experiencing a recurrence of side effects- urgency and frequency.”* |
| *“Forget about a good night’s sleep. I get up every 2 hours to pee.”* |
| Urine Incontinence | *“I am up to three and four changes daily. I am 81 and had prostate cancer 10 years ago, treated by radiation. The incontinence is getting worse and my doctor said the [artificial sphincter] might be the solution.”* | Brachytherapy (2)  CyberKnife (2)  External Beam Radiation (3)  General Radiation (4)  Grade 1-2 Adverse Effects (2)  Grade 3-4 Adverse Effects (6)  **All (19)** |
| *“It’s 10 months later and I have almost uncontrollable bowels and urine. I have already peed myself a few times. If I can’t find a bathroom, I’m in deep trouble.”* |
| *“After a few days he started to dribble a bit when he is in a relaxed state and then he started to go the entire time he is sleeping.”* |
| Urinary Tract Infection | *“He is experiencing this pain as well as urinary and fecal incontinence. He revisited the hospital today and was told he had an infection.”* | Brachytherapy (1)  CyberKnife (1)  General Radiation (1)  Grade 1-2 Adverse Effects (1)  Grade 3-4 Adverse Effects (2)  **All (6)** |
| *“My husband was the same, virtually no sleep, then he started having urine infections as well.”* |
| Bladder Hypersensitivity | *“A cystoscope last year did not indicate any bladder abnormalities, but I am describing it as hypersensitive. My urologist thinks this is a long term side effect from radiation.”* | Brachytherapy (3)  General Radiation (2)  Grade 1-2 Adverse Effects (1)  Grade 3-4 Adverse Effects (2)  **All (8)** |
| *“…the radiation has made my bladder hypersensitive, so I feel like I have to pee all the time.”* |
| Bladder Neck Contracture | *“…had probably 8-10 bladder neck surgeries. Before I got to this stage I had 33 treatments of EBRT.”* | Brachytherapy (1)  External Beam Radiation (4)  Grade 3-4 Adverse Effects (3)  **All (8)** |
| *“…during radiation I underwent 4 bladder neck contractures.”* |

**Supplementary table 2.** Frequency ofmentions of abdominal adverse effects by category with examples of patients quotes.

| **Adverse Effect** | **Patient Quote** | **User Category (Number of Mentions)** |
| --- | --- | --- |
| Abdominal gas | *“I had a bloated stomach…it passed, but left me with what appear to be IBS symptoms…but could be late after-effects of radiation; wind, a light trickle of mucous, uncertainty as to passing wind or slight mucus.”* | General Radiation (2)  CyberKnife (1)  Grade 1-2 Adverse Effects (2)  **All (5)** |
| Abdominal/pelvic pain | *“After the radiation treatment he has been experiencing episodes of fatigue, dizziness, and severe pain in his abdomen. It has been almost 3 weeks since his last treatment…”* | Brachytherapy (4)  General Radiation (3)  Intensity Modulated Radiation (1)  Grade 1-2 Adverse Effects (3)  **All (11)** |
| *“I am now having pains in the groin, pelvis, scrotum, and lower stomach that needs attending to.”* |
| Anal discharge | *“The oncologist said it could take months for the fluid to go away.”* | General Radiation (1)  Intensity Modulated Radiation (3)  Grade 1-2 Adverse Effects (6)  **All (10)** |
| *“Now, almost September I am still getting a clear fluid coming out of my rectum.”* |
| Blood in stool | *“At 5 years milestone, I experienced blood in stool which from a colonoscopy was diagnosed as diverticulitis, but the same image study verified existing radiation proctitis/cystitis which could in fact be the cause of the bleeding.”* | Brachytherapy (2)  External Beam Radiation (1)  General Radiation (4)  Intensity Modulated Radiation (5)  Grade 1-2 Adverse Effects (5)  Grade 3-4 Adverse Effects (1)  **All (18)** |
| *“I did bleed several months after…and mentioned this to the radiation oncologist. He told me the bleeding would stop in due time…but I kept harassing him and was advised to get a colonoscopy…during the procedure the gastroenterologist used argon plasma coagulation on a few spots.”* |
| Loose stool | *“Toward the end of the treatments and for around the next 6 months the bowel side effects showed up. These included loose stool and frequent bowel movements, up to 6 or 7 a day.”* | Brachytherapy (1)  CyberKnife (4)  External Beam Radiation (1)  General Radiation (4)  Intensity Modulated Radiation (4)  Grade 1-2 Adverse Effects (10)  **All (24)** |
| *“I experienced diarrhea during the first 3 months post RT as short term side effects.”* |
| Fecal incontinence | *“Radiation treatment (43) damaged my nerves…I now can walk, barely, with a cane…I have lost control of my bowels.”* | Brachytherapy (3)  CyberKnife (2)  External Beam Radiation (1)  General Radiation (1)  Grade 1-2 Adverse Effects (1)  Grade 3-4 Adverse Effects (3)  **All (11)** |
| *“…he also had damage to the bowel with the same urgency and no control. He had treatment for that, which is now much more under control, but has to watch what he eats.”* |
| Radiation-induced GI tract inflammation | *“2nd week of February this year began experiencing radiation proctitis, confirmed with colonoscopy, Easter Saturday procedure. Condition is still prevalent, easing off slowly as time goes by.”* | Brachytherapy (2)  Cyberknife (3)  General Radiation (9)  Intensity Modulated Radiation (3)  Grade 1-2 Adverse Effects (8)  Grade 3-4 Adverse Effects (3)  **All (28)** |
| *“Last Monday I had the sigmoidoscopy which showed the radiation proctitis…Dr said I had it pretty bad…so he did the Argon Plasma Coag.”* |

**Supplementary table 3.** Times of onset of adverse effects by category with examples of patients quotes.

| **Onset of Adverse Effects** | **Patient Quotes** | **User Category (Number of Mentions)** |
| --- | --- | --- |
| After Radiation | *“I was 18 months out from IGRT when I started having drops of blood in urine, especially after a BM. Had a cystoscope exam, which found large tracts of my urethra and bladder neck that had been burned by the RT. They were literally raw spots. Over time (10 months) that has improved.”* | Brachytherapy (27)  CyberKnife (10)  External Beam Radiation (5)  General Radiation (32)  Intensity Modulated Radiation (24)  Grade 1-2 Adverse Effects (38)  Grade 3-4 Adverse Effects (18)  **All (154)** |
| *“Ever hear of radiation burn 5 years later? Very constrictive and just plain mean.”* |
| *“2 weeks later, my urine was full of blood and my urethra was blocked. I went to the hospital to have a cystoscopy…my urologist said my bladder is damaged…said the bladder inside is like a moon.”* |
| During Radiation | *“During treatments about the second or third week I experienced urinary side effects such as urgency and frequent trips to the bathroom. Dr prescribed Flomax which took care of these symptoms.”* | Brachytherapy (1)  CyberKnife (1)  External Beam Radiation (2)  General Radiation (6)  Intensity Modulated Radiation (6)  Grade 1-2 Adverse Effects (10)  **All (26)** |
| *“Diarrhea started my second week and by the end of treatment I was bleeding rectally…for many weeks I would go all day feeling like I had to defecate, and often would several times a day.”* |
| *“About halfway through he started getting burning with urination and pain with bowel movements. Toward the end of his treatments, bowel movements became excruciating even though his stools were soft.”* |

**Supplementary table 4.** Resolution of adverse effects by category with examples of patient quotes.

| **Adverse Effects Resolution** | **Patient Quotes** | **User Category (Number of Mentions)** |
| --- | --- | --- |
| Symptoms Ongoing | *“The cancer is gone, but this frequency/urgency/nocturia started up about 2 years ago and despite a PAE (prostate artery embolization) and TURP (transurethral resection of prostate), continues…”* | Brachytherapy (18) CyberKnife (3)  External Beam Radiation (4)  General Radiation (11)  Intensity Modulated Radiation (6)  Grade 1-2 Adverse Effects (11)  Grade 3-4 Adverse Effects (11)  **All (68)** |
| *“I developed chronic radiation proctitis and other GI tract problems. I also have chronic burn of the urinary tract. The symptoms have gotten worse.”* |
| *“Now 3 months post TURP (transurethral resection of prostate) my flow continues to improve- very glad I had that done. But, the bladder irritation and lack of sleep continue to be issues, especially getting up 6-10x per night.”* |
| Symptoms Resolving with Treatment | *“Recently I had a bipolar TURP (transurethral resection of prostate) to help with restricted flow and symptoms of overactive bladder- frequency/urgency and nocturia. The TURP has helped my flow and after several attempts I can now empty my bladder.”* | External Beam Radiation (1)  General Radiation (3)  Intensity Modulated Radiation (7)  Grade 1-2 Adverse Effects (10)  Grade 3-4 Adverse Effects (3)  **All (35)** |
| *“In the 2-3 months after RT (radiation therapy) I experienced mucous with stool and with occasional blood traces, but it was all treated with separate medications and it did stop.”* |
| *“The following year I had my bladder cut open to allow me to wee as the radiation caused my bladder neck to scar over.”* |
| Symptoms Resolving without Treatment | *“Toward the end of the treatments…the bowel side effects showed up. These included loose stool and frequent bowel movements…the good news is that all of this has disappeared.”* | Brachytherapy (1)  CyberKnife (3)  External Beam Radiation (2)  General Radiation (2)  Intensity Modulated Radiation (7)  Grade 1-2 Adverse Effects (10)  **All (25)** |
| *“I also got bleeding from the colon after about a year. A colonoscopy confirmed that the radiation had caused the bleeding. Over about a year or so, the bleeding gradually mostly dried up.”* |
| *“The urinary urgency problem has been fading, though not yet gone. I leak a little, but used the diapers, then the pads until I felt I could go without.”* |
